# Supplementary material for: Genomic and transcriptomic analysis of pituitary adenomas reveals the impacts of copy number variations on gene expression and clinical prognosis among prolactin-secreting subtype
Source: publisher site journal article supplement (doi:10.18632/aging.202304), 2020-12-19
Supplement: Supplementary file [file aging-v13i1-202304-supplementary-material-SD1.pdf]

## SUPPLEMENTARY FIGURES

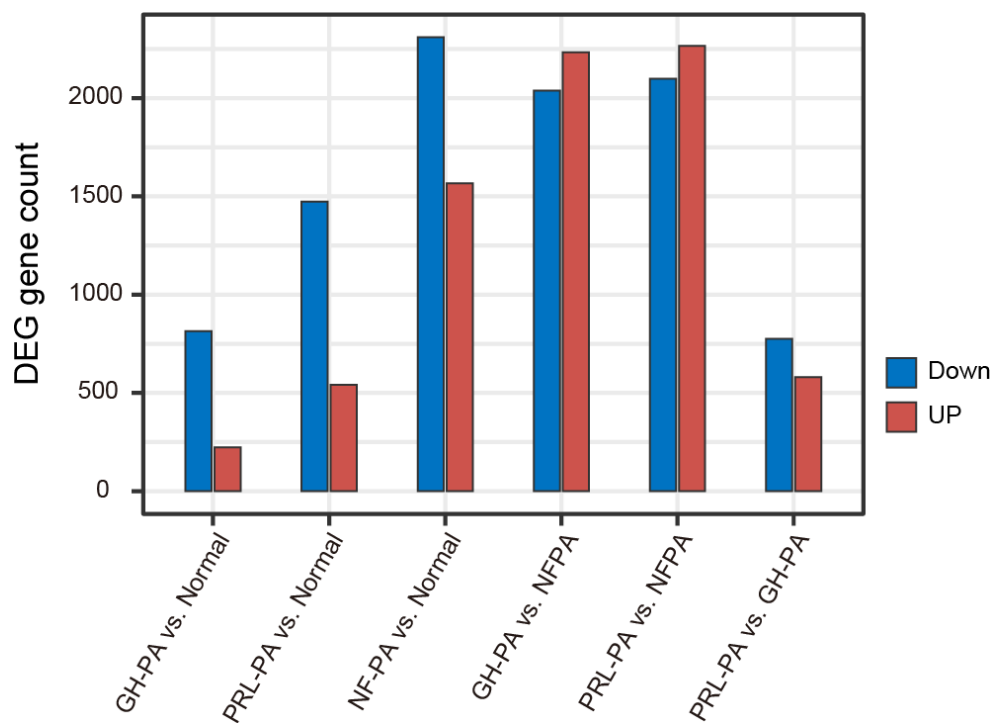

Supplementary Figure 1. Comparison of the number of upregulated DEGs (Red) and downregulated DEGs (Blue) in 6 pairwise DEGs analysis. DESeq2, FDR < 0.05.

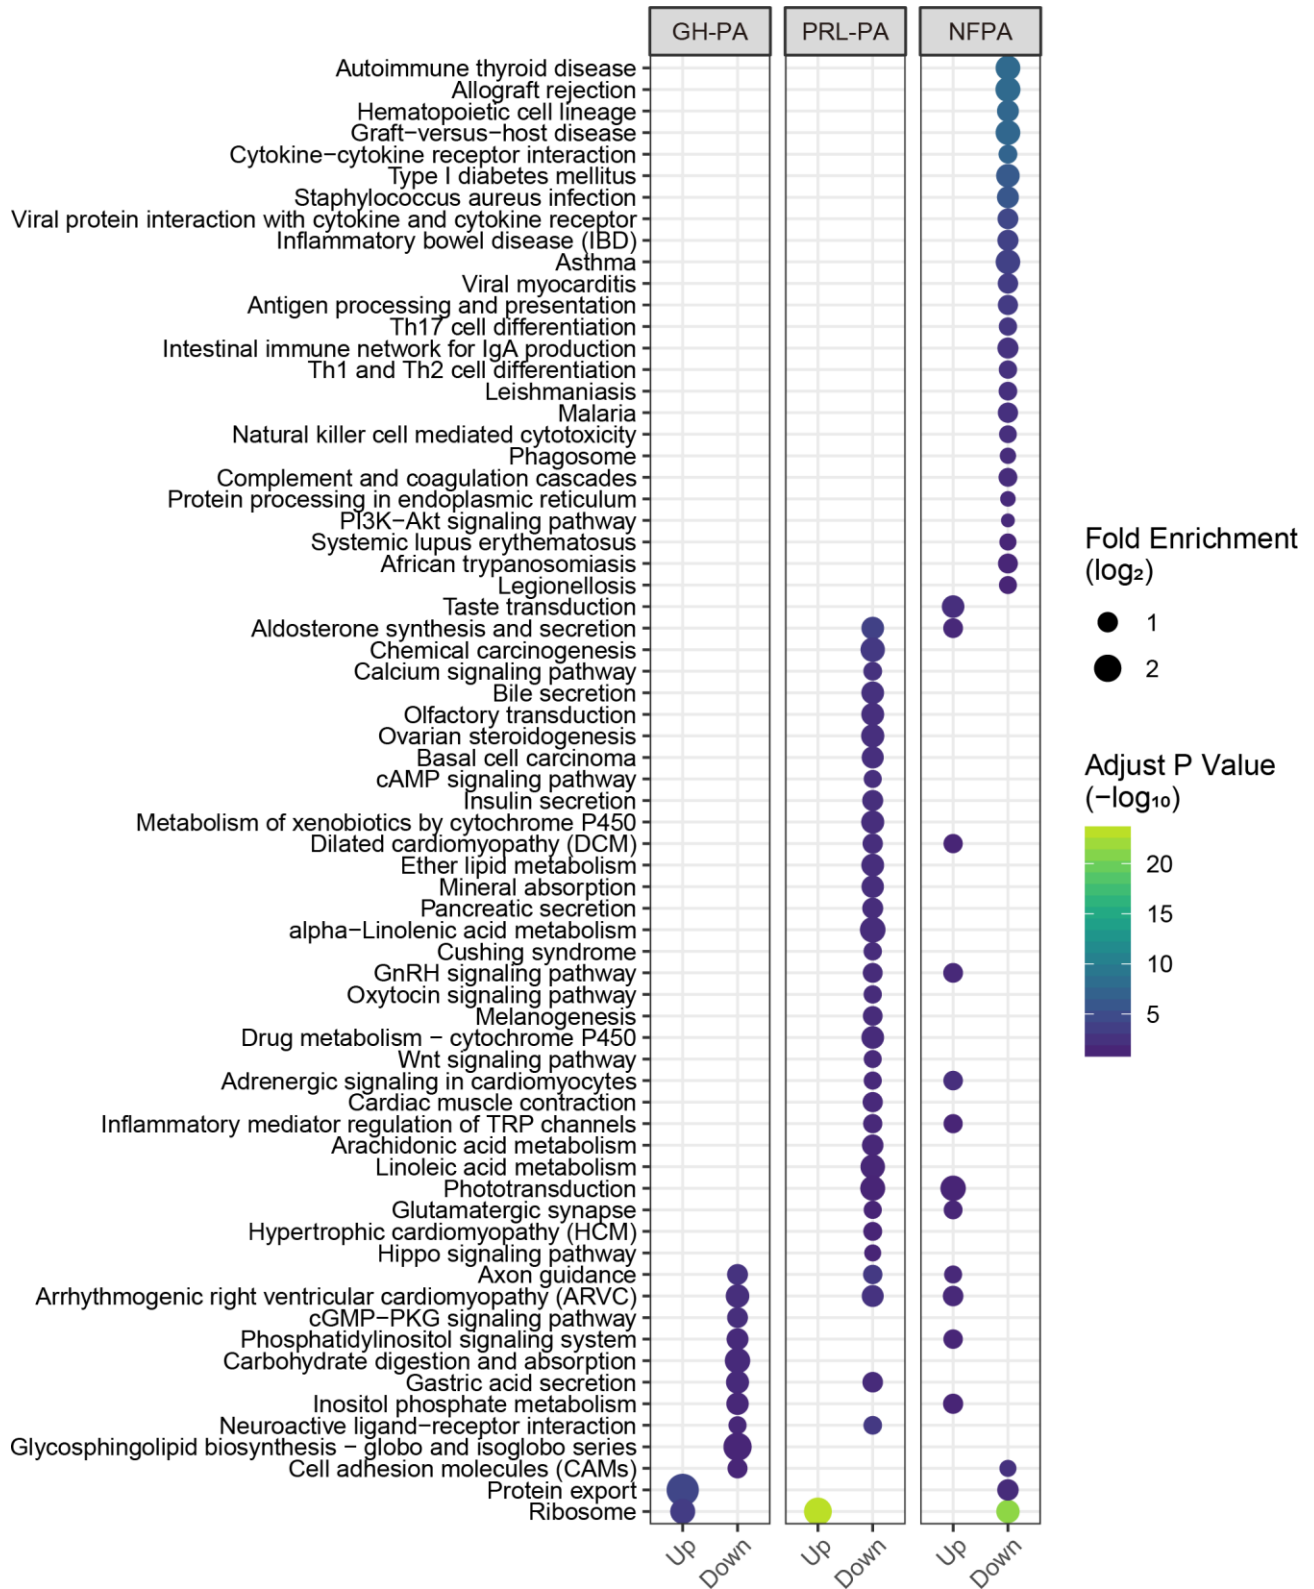

**Supplementary Figure 2. KEGG pathway enrichment analysis of genes among three PA subtypes vs. Normal.** Adjusted P value < 0.05.

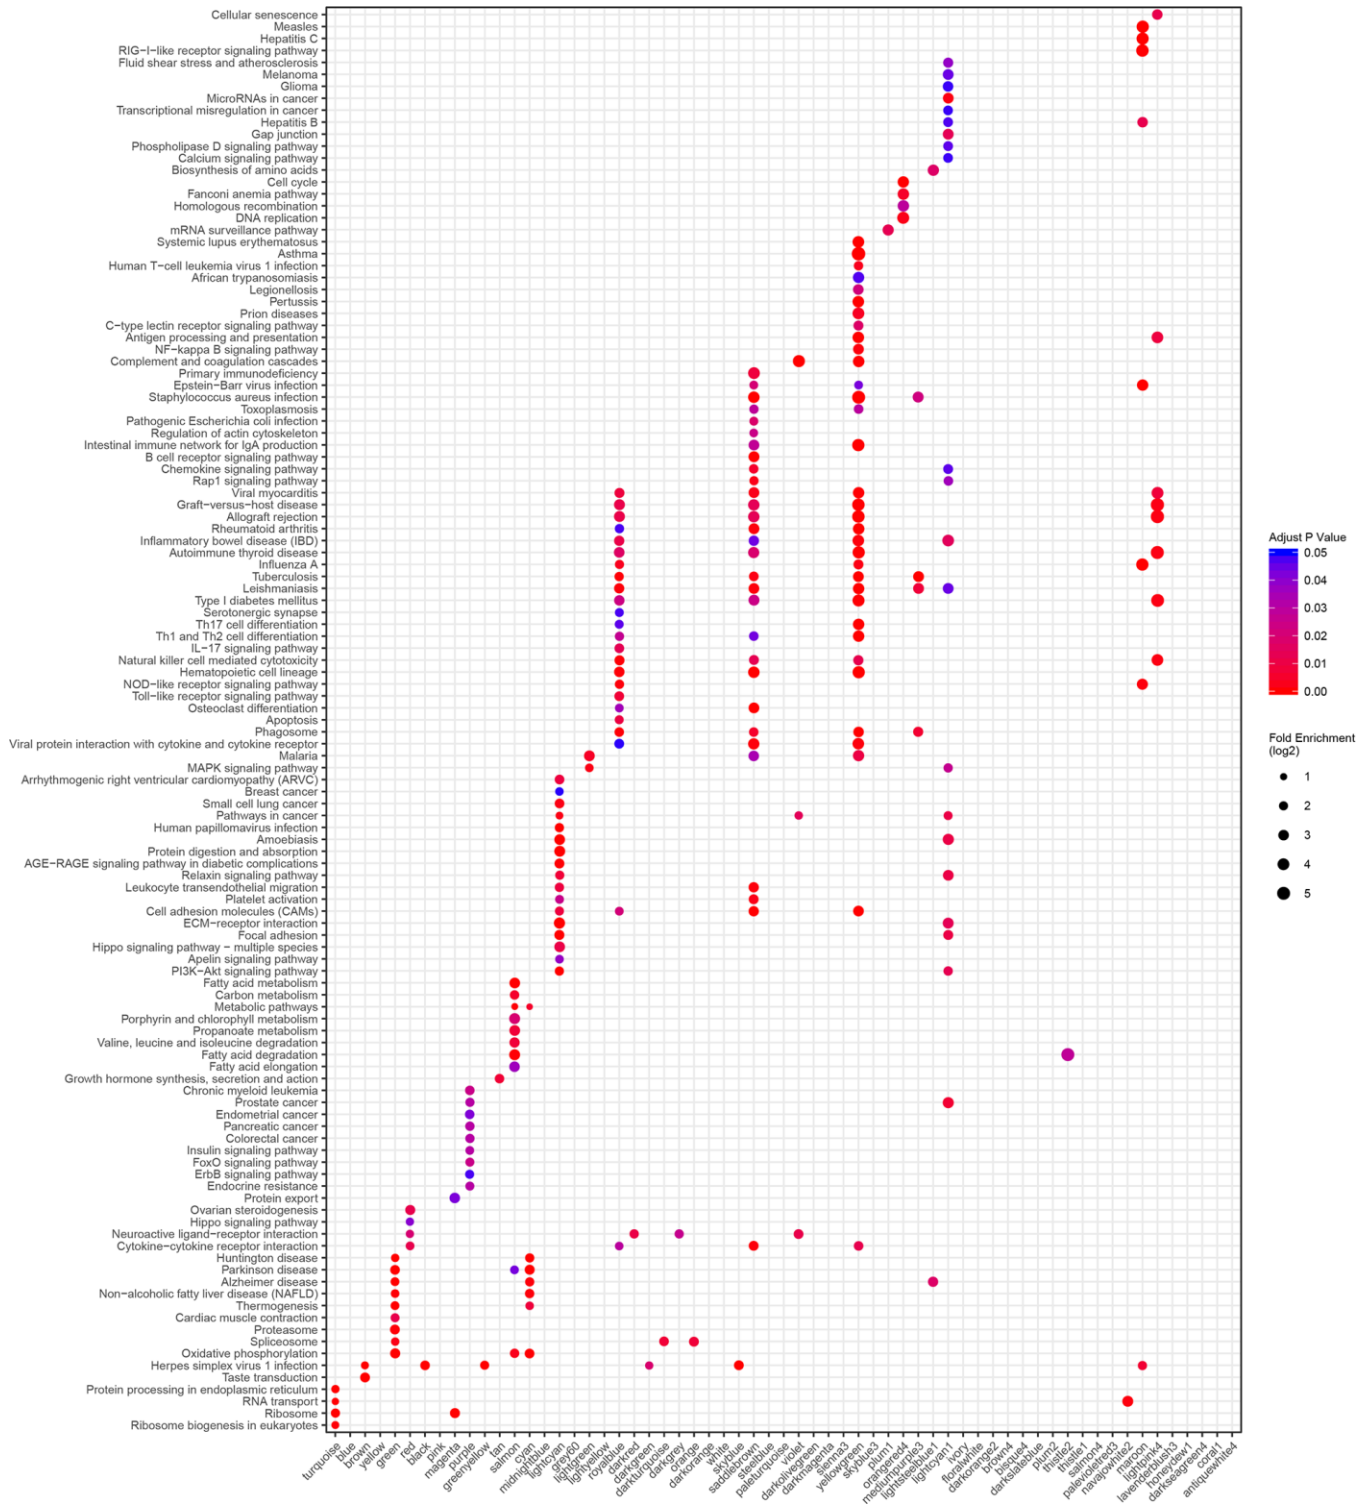

**Supplementary Figure 3. KEGG pathway enrichment analysis of genes in the modules significantly associated with different PA subtypes. Adjusted P value < 0.05.**
